# Supplementary material
Source: PubMed Central journal article supplement (PMC5339046)
Supplement: NIHMS837416-supplement-Sup_info.pdf [file NIHMS837416-supplement-Sup_info.pdf]

**An Isogenic Blood-Brain Barrier Model Comprising Brain Endothelial Cells, Astrocytes  
and Neurons Derived from Human Induced Pluripotent Stem Cells.**

Scott G. Canfield<sup>1</sup>, Matthew J. Stebbins<sup>1</sup>, Bethsymarie Soto Morales<sup>1</sup>, Shusaku W. Asai<sup>1</sup>, Gad  
D. Vatine<sup>2</sup>, Clive N. Svendsen<sup>2</sup>, Sean P. Palecek<sup>1\*</sup>, and Eric V. Shusta<sup>1\*</sup>

<sup>1</sup>Department of Chemical and Biological Engineering, University of Wisconsin Madison,  
Madison, WI 53706

<sup>2</sup>Cedars-Sinai Medical Center, Board of Governors Regenerative Medicine Institute, Los  
Angeles, CA 90048

Table S1.

| Target Antigen                            | Antibody Species | Vendor                | Clone/Product Number | Dilution*            |
|-------------------------------------------|------------------|-----------------------|----------------------|----------------------|
| Pecam-1                                   | Rabbit           | Thermo Scientific     | RB-10333             | 1:25                 |
| VE-Cadherin                               | Mouse            | Santa Cruz            | F-8                  | 1:100                |
| Glut-1                                    | Mouse            | Thermo Scientific     | SPM498               | 1:500<br>1:200 (FC)  |
| Claudin-5                                 | Mouse            | Life Technologies     | 4C3C2                | 1:200<br>1:500 (WB)  |
| Occludin                                  | Mouse            | Life Technologies     | OC-3F10              | 1:50<br>1:500 (WB)   |
| P-glycoprotein                            | Mouse            | Thermo Scientific     | P170(F4)             | 1:25<br>(FC)         |
| Multidrug resistance-associated protein 1 | Mouse            | Millipore             | MAB4100              | 1:25<br>(FC)         |
| Breast Cancer resistance protein          | Mouse            | Millipore             | MAB4155              | 1:50<br>1:25 (FC)    |
| Transferrin Receptor                      | Mouse            | R&D                   | MAB2474              | 1:200(FC)            |
| Nestin                                    | Mouse            | Millipore             | 10C2                 | 1:500                |
| Beta-III-tubulin                          | Rabbit           | Sigma                 | T3952                | 1:500<br>1:3000 (FC) |
| Glial fibrillary acidic protein           | Rabbit           | Dako                  | ZO334                | 1:500<br>1:5000(FC)  |
| Pax-6                                     | Mouse            | Developmental Studies | 1C8                  | 1:100                |
| S100B                                     | Mouse            | Abcam                 | 11178                | 1:200                |

\*Dilutions given are ideal for immuno-chemistry unless otherwise noted, WB = western blot, FC = flow cytometry.

**Supplementary Table 1. Antibodies used for Immunocytochemistry, Flow Cytometry, and Western blot.**

## Supplementary Figure 1

A.

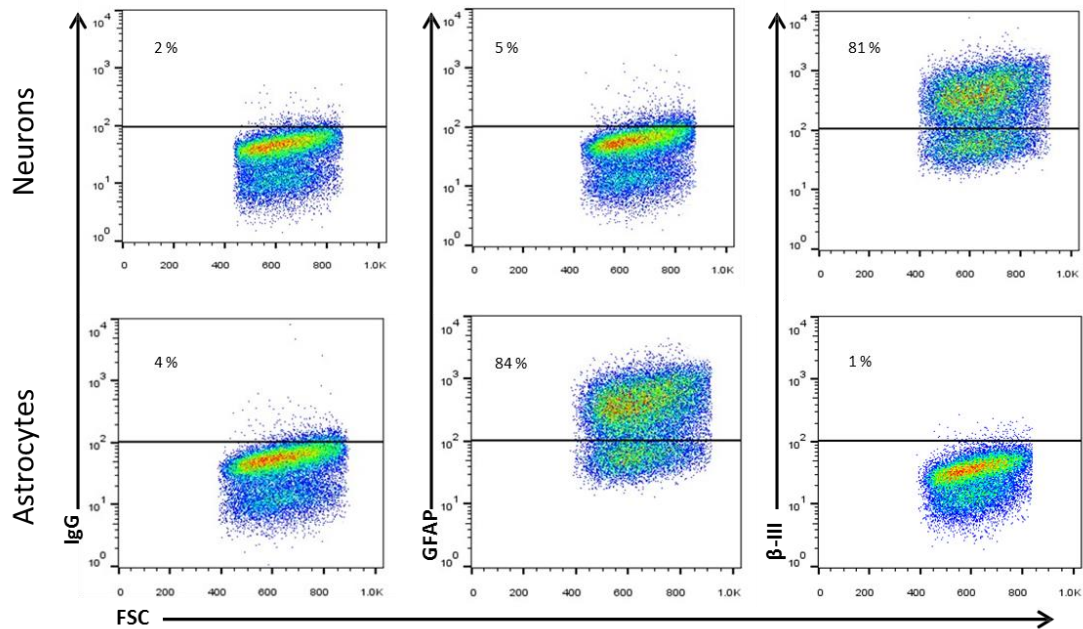

B.

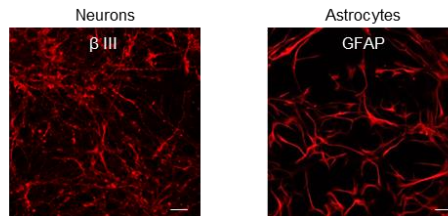

**Supplementary Figure 1. Characterization of Day 14 EZ-sphere-derived astrocytes and neurons.** (A) Representative flow cytometry density plots from EZ-sphere-derived astrocytes and neurons. Gates were drawn based on rabbit IgG control antibody labeling, and the percentage of total events having immunolabeling above rabbit IgG control is noted. 84% of the differentiated astrocyte population expressed GFAP. 81% of the differentiated neuron population expressed  $\beta$ -III tubulin. (B) CS03n2 EZ-sphere derived neurons and astrocytes continued to express  $\beta$ -III tubulin and GFAP, respectively following 48 h co-culture with CS03n2 iPSC-derived BMECs. Scale bars = 100 $\mu$ m.

## Supplementary Figure 2

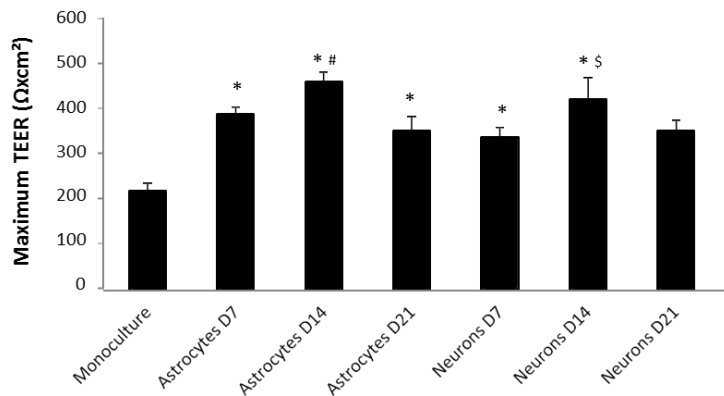

**Supplementary Figure 2. Duration of neuron and astrocyte differentiation that induces maximum barrier tightening.** 4.2 EZ-sphere-derived astrocytes and neurons were differentiated for 7 days, 14 days, and 21 days and combined in co-culture with IMR90-4-derived BMECs. TEER measurements were taken at 48 h after the initiation of co-culture. Statistical significance was calculated using ANOVA. \* $p < 0.05$  vs. monoculture, # $p < 0.05$  vs. astrocytes D7 or D21, \$ $p < 0.05$  vs. neurons D7 or D21. Values are mean  $\pm$  SD of three replicates from a single isolation/differentiation, and experiments were repeated for three more additional differentiations for verification of reported statistical trends.

### Supplementary Figure 3

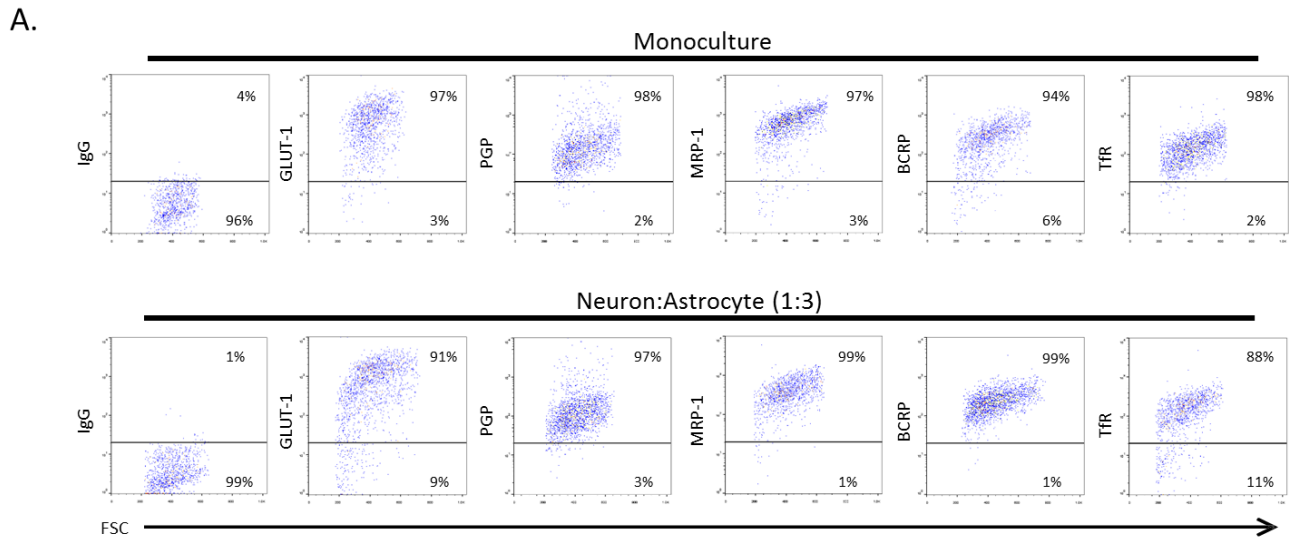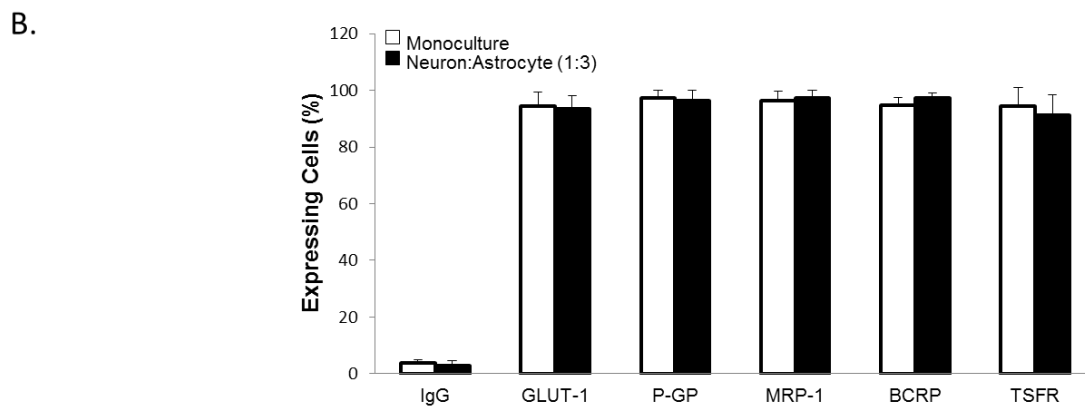

**Supplementary Figure 3. Flow cytometric analysis of BMECs following co-culture with EZ-sphere-derived neurons and astrocytes (1:3).** (A) Representative flow cytometry dot plots from IMR90-4 BMECs in monoculture or after 48 hours of co-culture with 4.2 EZ sphere-derived neuron and astrocytes (1:3). Gates were drawn based on mouse IgG negative control antibody immunolabeling, and the percentage of transporter immunopositive cells is noted in the insets to panel (A) and is compiled in panel (B). Geometric means of the transporter immunopositive populations were extracted from these flow data and are quantitatively compared in Figure 5C. Statistical significance was determined using a Student's t-test. Values are mean  $\pm$  SD of three independent differentiations.
